# Supplementary material
Source: HighWire-hosted journal article supplement (http://www.qdcxjkg.com/highwire/filestream/113606/field_highwire_adjunct_files/4/patient_info_-_tests_conducted_in_tb_clinics_-_hindi.pdf)
Supplement: patient_info_-_tests_conducted_in_tb_clinics_-_hindi.pdf [file patient_info_-_tests_conducted_in_tb_clinics_-_hindi.pdf]

# टीबी क्लिनिकों में संचालित परीक्षण

Patient information:

HIV testing in TB clinics (Hindi)

## छाती का एक्स-रे

इसे यह जांचने के लिए किया जाता है कि आपको फेफड़ों का टीबी है या नहीं। इसे बाद में, यह जांचने के लिए दोबारा किया जा सकता कि आपका इलाज काम कर रहा है या नहीं।

## थूक/बलगम का परीक्षण

आपसे थूक के नमूने देने के लिए कहा जा सकता है जिससे यह जांचा जा सके कि आपको फेफड़ों का टीबी है या नहीं। यह परीक्षण बाद में, यह जांचने के लिए दोबारा किया जा सकता है कि आपका इलाज काम कर रहा है या नहीं।

## रक्त परीक्षण

रक्त परीक्षण दिखा सकते हैं कि आप रक्तहीनता से पीड़ित हैं या नहीं, अथवा आपके शरीर में कोई संक्रमण तो नहीं है। इलाज प्रारंभ करने के बाद, इन परीक्षणों को दोहराने से हमें पता चल सकता है कि संक्रमण जा रहा है या नहीं।

अन्य परीक्षण भी किए जाते हैं जो हमें बताते हैं कि इलाज से पहले एवं इसके दौरान आपका कलेजा एवं गुर्दे किस प्रकार काम कर रहे हैं। यह परीक्षण महत्वपूर्ण हैं क्योंकि आपको दी जाने वाली कुछ औषधियां आपके कलेजे एवं गुर्दे के प्रकार्य को प्रभावित कर सकती हैं।

## अन्य संक्रमणों के लिए परीक्षण

टीबी क्लिनिक में आने वाले हर किसी को हम एक एचआईवी परीक्षण पेश करते हैं। एचआईवी, शरीर के प्रतिरक्षी तंत्र को हानि पहुंचाता है अतः टीबी अधिक आसानी से अपनी पकड़ मजबूत कर सकती है। एचआईवी के लिए अच्छा इलाज मौजूद है जो आपका स्वास्थ्य सुधार सकता है।

## अन्य संक्रमणों के लिए परीक्षण

यकृतशोथ (हैपेटाइटिस) बी एवं यकृतशोथ (हैपेटाइटिस) सी संक्रमणों के लिए हम आपका परीक्षण कर सकते हैं। ये संक्रमण आपके कलेजे के काम करने के तरीके को बदल सकते हैं एवं आपके टीबी के इलाज को प्रभावित कर सकते हैं। यदि आपके परीक्षण सकारात्मक आता है तो आपको एक विशेषज्ञ दल के पास भेजा जा सकता है।

## गोपनीयता

आपके सभी परीक्षणों के परिणामों को गोपनीय रखा जाएगा एवं जानकारी को केवल आपकी देखभाल से प्रत्यक्ष रूप से जुड़े हुए स्वास्थ्यसेवा के पेशेवरों के साथ बांटा जाएगा।

## अधिक जानकारी

### एचआईवी

NAHIP: [www.nahip.org.uk](http://www.nahip.org.uk)

Do It Right:

[www.doitright.uk.com](http://www.doitright.uk.com)

THT: [www.tht.org.uk](http://www.tht.org.uk)

### टीबी

NKS TB:

[www.hpa.org.uk/tbknowledge](http://www.hpa.org.uk/tbknowledge)

TB Alert: [www.tbalert.org](http://www.tbalert.org)

### अन्य उपयोगी साइटें

NHS choices: [www.nhs.uk](http://www.nhs.uk)

Health Protection Agency:

[www.hpa.org.uk](http://www.hpa.org.uk)
